# Supplementary material for: Das vaskuläre Trauma: Analyse der Versorgungsrealität in einer deutschlandweiten Umfrage
Source: Springer Nature journal article supplement (doi:10.1007/s00772-023-01006-3), 2023-06-19
Supplement: MOESM1 [file 25510840]

Fragenkatalog zur Umfrage der Kommission Katastrophenmedizin und Gefäßtraumatologie –  
Abbildung der Versorgungsrealität von stationären Patienten mit traumatischen  
Gefäßverletzungen

**Allgemeiner Teil**

1. Wie viele Betten hat Ihr Krankenhaus?
  - Bis 200 Betten
  - Bis 500 Betten
  - Über 500 Betten
  
2. Ihre Abteilung für Gefäßchirurgie ist
  - Eine eigenständige Abteilung
  - Klinik für Gefäßmedizin gemeinsam mit Radiologie/Angiologie
  - Sektion einer Allgemein- oder Viszeralchirurgie
  - Sektion einer Herz- oder Thoraxchirurgie
  - Keines davon
  
3. Wie viele Monate beträgt die Weiterbildungsbefugnis Ihrer Klinik zum Facharzt für Gefäßchirurgie?
  - Keine Weiterbildungsermächtigung
  - 12 Monate
  - 24 Monate
  - 36 Monate
  - 48 Monate
  
4. Zertifizierung zum Traumazentrum vorhanden?
  - Nein
  - Lokales Traumazentrum
  - Regionales Traumazentrum
  - Überregionales Traumazentrum
  - Weiß nicht
  
5. Wie viele traumatische Verletzungen mit relevanter Gefäßbeteiligung behandeln Sie pro Jahr? (Rekonstruktionen, Embolisationen, Ligatur etc.)
  - Weniger als 5
  - 5-10
  - 11-20
  - 21-40
  - >40
  
6. Welche der genannten Ursachen für traumatische Gefäßverletzungen haben Sie in den letzten 5 Jahren behandelt? (Mehrfachnennung möglich)
  - Verkehrsunfall
  - Penetrierende Verletzungen (Messer, Schnittverletzungen etc.)
  - Pfählungsverletzungen
  - Schussverletzungen

- Stumpfer Verletzungsmechanismus
- Iatrogene Verletzungen (außer Punktionskomplikationen)

7. Wer ist der Traumaleader im Schockraum?

- Unfallchirurg
- Anästhesist
- Allgemeinchirurg
- Notfallmediziner
- Andere: \_\_\_\_\_

8. Wie lautet Ihre Postleitzahl?

### Spezieller Teil

9. Wer versorgt **intraabdominelle** traumatische Gefäßverletzungen in Ihrer Institution **offen chirurgisch**? (Mehrfachnennung möglich)

- Gefäßchirurgie
- Viszeralchirurgie
- Unfallchirurgie
- Andere: \_\_\_\_\_ (offene Antwort)
- Wird bei uns nicht angeboten

10. Wer versorgt **intraabdominelle** traumatische Gefäßverletzungen in Ihrer Institution **interventionell**? (Mehrfachnennung möglich)

- Gefäßchirurgie
- Radiologie
- Angiologie
- Kardiologie
- Andere: \_\_\_\_\_ (offene Antwort)
- Wird bei uns nicht angeboten

11. Wer versorgt **intrathorakale** traumatische Gefäßverletzungen in Ihrer Institution **offen chirurgisch**? (Mehrfachnennung möglich)

- Gefäßchirurgie
- Herzchirurgie
- Thoraxchirurgie
- Unfallchirurgie
- Allgemeinchirurgie
- Andere: \_\_\_\_\_ (offene Antwort)
- Wird bei uns nicht angeboten

12. Wer versorgt **intrathorakale** traumatische Gefäßverletzungen in Ihrer Institution **interventionell**? (Mehrfachnennung möglich)

- Gefäßchirurgie
- Radiologie
- Angiologie

- Kardiologie
- Andere: \_\_\_\_\_ (offene Antwort)
- Wird bei uns nicht angeboten

13. Wer versorgt traumatische Gefäßverletzungen **der Extremitäten** in Ihrer Institution **offen chirurgisch**? (Mehrfachnennung möglich)

- Gefäßchirurgie
- Unfallchirurgie
- Allgemeinchirurgie
- Andere: \_\_\_\_\_ (offene Antwort)
- Wird bei uns nicht angeboten

14. Wer versorgt traumatische Gefäßverletzungen **der Extremitäten** in Ihrer Institution **interventionell**? (Mehrfachnennung möglich)

- Gefäßchirurgie
- Radiologie
- Angiologie
- Kardiologie
- Andere: \_\_\_\_\_ (offene Antwort)
- Wird bei uns nicht angeboten

## Weiterbildung

15. Welche gefäßchirurgischen/endovaskulären Methoden zur Versorgung von Gefäßverletzungen haben Sie in Ihrer Weiterbildung selbständig und/oder unter Anleitung durchgeführt? (Mehrfachnennung möglich)

- Keine
- Stentimplantation
- Coiling/Embolisation
- Gefäßligatur
- Einfache Gefäßnaht
- Transposition
- Thrombektomie, TEA, Patchplastik
- Gefäßersatz, Interponat
- Andere

16. Wie sollten sich Gefäßchirurginnen/Gefäßchirurgen auf dem Gebiet der Gefäßtraumatologie unter Einbeziehung offener und interventioneller Techniken fortbilden? (Mehrfachnennung möglich)

- Hand on Kurse zur Versorgung von Gefäßtraumata mit Curriculum
- Videotutorials on demand
- Skript/Lehrbuch
- CME Fortbildung in der Zeitschrift „Gefäßchirurgie“
- Implementierung im Facharzkatalog
- Interdisziplinäre Kurse Notfallversorgung, z.B. ATLS
- Andere: \_\_\_\_\_ (offene Antwort)

17. Welche Aussage zum REBOA-Verfahren (Resuscitative Endovascular Balloon Occlusion of the Aorta) trifft für Sie am ehesten zu?

- Das Verfahren kenne ich nicht
- Ich kenne das Verfahren, halte das Erlernen und den klinischen Einsatz jedoch für verzichtbar oder in meinem Umfeld nicht umsetzbar
- Ich kenne das Verfahren, finde es interessant, habe es jedoch noch nicht klinisch angewendet
- Ich habe bereits einen Kurs besucht, konnte es bisher jedoch nicht klinisch anwenden
- Ich habe REBOA bereits klinisch angewendet

18. Welche Aussage zur Clamshell Thorakotomie trifft für Sie am ehesten zu?

- Das Verfahren kenne ich nicht
- Ich kenne das Verfahren, halte das Erlernen und den klinischen Einsatz jedoch für verzichtbar oder in meinem Umfeld nicht umsetzbar
- Ich kenne das Verfahren, finde es interessant, habe es jedoch noch nicht klinisch angewendet
- Ich habe bereits einen Kurs besucht, konnte es bisher jedoch nicht klinisch anwenden
- Ich habe die Clamshell Thorakotomie bereits klinisch angewendet

19. Welche Kurse zum Erlernen von Zugängen und Methoden der Gefäßtraumatologie würden Sie gerne besuchen? (Mehrfachnennung möglich)

- Gar keine
- Seminar, E-Learning, Erklärvideos
- Operative/endovaskuläre Kurse am Modell
- Operative/endovaskuläre Kurse mit lebenden Tieren
- Operative/endovaskuläre Kurse an Kadavern (Körperspender)
- Keine
